# Supplementary material for: MoS2 spheres covered with a few layers of MXene as a high-performance anode for sodium-ion batteries
Source: Royal Society of Chemistry journal article supplement (doi:10.1039/d4dt01847h), 2024-01-01
Supplement: d4dt01847h1.pdf [file d4dt01847h1.pdf]

## Supporting Information

### MoS<sub>2</sub> spheres covered with few layers of MXene as a high-performance anode for sodium-ion batteries

Yumei Zhang <sup>a</sup>, Jialiang Chen <sup>a</sup>, Tianxing Kang <sup>a</sup>, Wei Yang <sup>a</sup>, Hanbo Zou <sup>a</sup>, Shengzhou Chen <sup>\*a</sup>

<sup>a</sup> School of Chemistry and Chemical Engineering, Guangzhou University, Guangzhou, 510006 ,

PR China

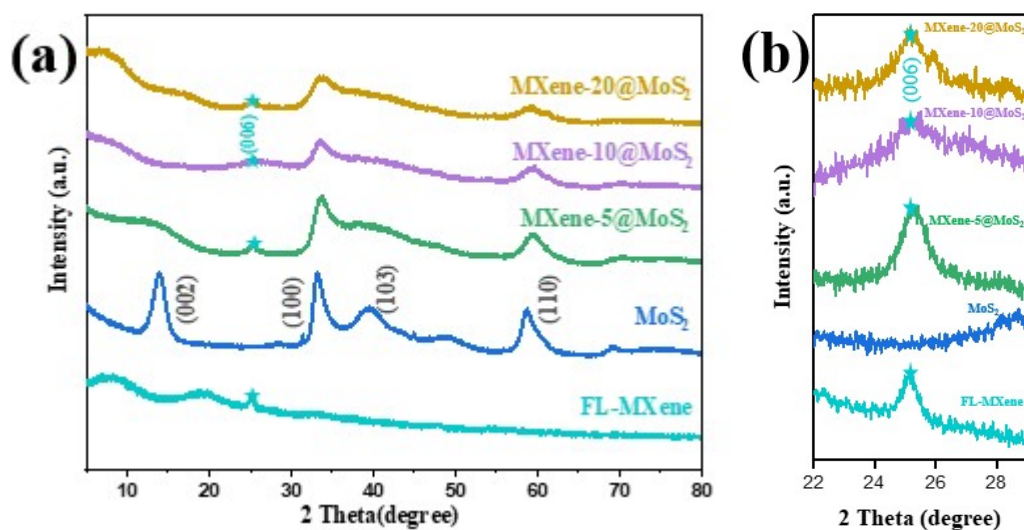

Fig. S1 (a) XRD diffraction patterns of FL-MXene, MoS<sub>2</sub> and MXene@MoS<sub>2</sub> composites, (b) Magnified XRD patterns of FL-MXene, MoS<sub>2</sub> and MXene@MoS<sub>2</sub> composites at the 2θ range of 22-29°

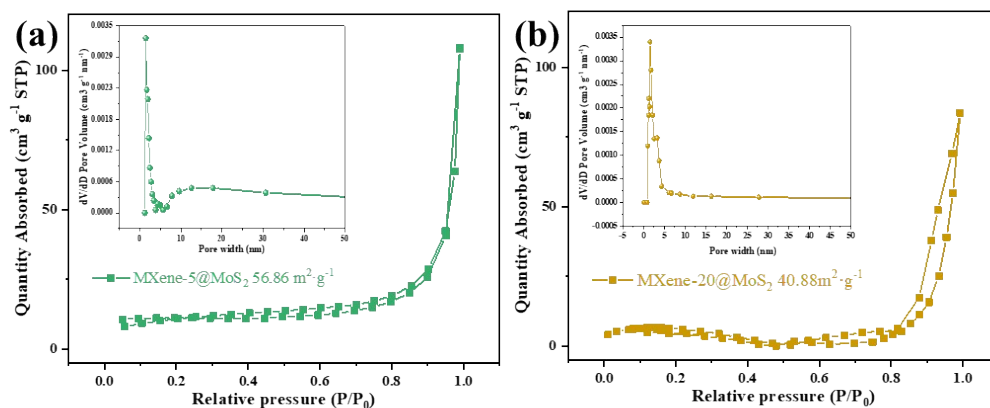

Fig. S2 N<sub>2</sub> adsorption/desorption isotherms of (a) MXene-5@MoS<sub>2</sub> and (b) MXene-20@MoS<sub>2</sub>.

Table S1 The contents of Mo and Ti in MXene@MoS<sub>2</sub> composite s detected by ICP analysis.

| Samples                   | Mo (Wt.%) |         | Ti (Wt.%) |         |
|---------------------------|-----------|---------|-----------|---------|
|                           | theory    | reality | theory    | reality |
| MoS <sub>2</sub>          | 59.94     | 60.03   | 0         | 0       |
| MXene-5@MoS <sub>2</sub>  | 56.81     | 58.34   | 4.48      | 2.53    |
| MXene-10@MoS <sub>2</sub> | 53.70     | 55.78   | 8.90      | 5.98    |
| MXene-20@MoS <sub>2</sub> | 47.51     | 50.26   | 17.77     | 12.90   |
